# Supplementary material for: Association of Real‐Time Feedback and Cardiopulmonary‐Resuscitation Quality Delivered by Ambulance Personnel for Out‐of‐Hospital Cardiac Arrest
Source: PubMed Central journal article supplement — J Am Heart Assoc. 2023 Oct 17;12(20):e029457. doi: 10.1161/JAHA.123.029457 (PMC10757518; doi:10.1161/jaha.123.029457), 2023-10-17
Supplement: JAH3-12-e029457-s001.pdf [file JAH3-12-e029457-s001.pdf]

# **SUPPLEMENTAL MATERIAL**

**Data S1.**

## **Supplemental Methods**

### **Reasons for edit in CaseReview**

A. LUCAS excluded

Mechanical CPR was performed. Identified by a steady rate of 101 or 103 compressions per minute. Period of LUCAS excluded from the last valid compression prior to activation of LUCAS

B. False start

The first CPR period is < 20 seconds of chest compressions or < 30 chest compressions followed by a CPR pause of > 90 seconds. The new first CPR period begins at the first sets of compressions outside the mentioned low cut-off.

C. Pause with compressions

An error caused by artefact/movement. The pattern is identified by a registration of chest compression pause in the chest compression fraction bar while chest compression depth bars indicate chest compression. Case edited from the last valid compression or pause.

D. No CPR

Cases that initially contained chest compressions but where the edition process removed all compressions, leaving the case without valid manual compressions or compression period are  $\leq 20$  seconds or < 30 chest compressions.

E. OK

The case has been reviewed, or editing of the case is complete, and the case is valid.

F. Corrected error

The case has been manually edited, and an error has been corrected

**Table S1. Significance level with adjustments.**

| Analysis                                    | Semi adjusted*     | Fully adjusted † | Unadjusted ‡ |
|---------------------------------------------|--------------------|------------------|--------------|
| <i>Variable</i>                             | <i>Probability</i> |                  |              |
| CCD (cm), median (IQR)                      | 0.88               | 0.76             | 0.85         |
| CCDiT (%), median (IQR)                     | < 0.001            | < 0.001          | < 0.001      |
| CCR (compressions per minute), median (IQR) | < 0.001            | < 0.001          | < 0.001      |
| CCRiT (%), median (IQR)                     | < 0.001            | < 0.001          | < 0.001      |
| CCF (%), median (IQR)                       | < 0.001            | < 0.001          | < 0.001      |
| CCiT (%), median (IQR)                      | < 0.001            | < 0.001          | < 0.001      |

\* adjusted for bystander CPR, † adjusted for (all variables), ‡ no adjustment from manus table 2

Outcome descriptives significance with adjustments

CCD: chest compression depth, CCDiT: chest compression depth in target, CCF: chest compression fraction, CCiT: compressions in target, cm: centimetre, CCR: chest compression rate, CCRiT: chest compression rate in target, IQR: interquartile range.

**Table S2. Baseline characteristics (with statistical comparison).**

| Out-of-hospital cardiac arrest characteristics |                  |                    |                  |                       |       |
|------------------------------------------------|------------------|--------------------|------------------|-----------------------|-------|
| Variable / Phase                               | No feedback      | Real-time feedback | Total            | Missing values, n (%) | P     |
| N, (%)                                         | 467 (51.2)       | 446 (48.9)         | 913 (100)        | -                     |       |
| Age years, median (IQR)                        | 74.0 (62.0-83.0) | 74.5 (63.0-82.0)   | 74.0 (63.0-82.0) | 0                     | 0.52  |
| Sex – male, n (%)                              | 305 (65.3)       | 282 (63.9)         | 589 (64.5)       | 0                     | 0.61  |
| Location – private*, n (%)                     | 378 (80.9)       | 342 (76.9)         | 720 (78.9)       | 0                     | 0.12  |
| First EMS recorded rhythm – shockable, n (%)   | 81 (17.8)        | 77 (17.6)          | 158 (17.7)       | 22 (2.4)              | 0.93  |
| Witnessed by bystander, n (%)                  | 218 (46.7)       | 228 (51.1)         | 446 (48.9)       | 0                     | 0.18  |
| Bystander CPR, n (%)                           | 332 (71.1)       | 289 (64.9)         | 621 (68.1)       | 1 (< 1)               | 0.047 |
| Bystander defibrillation, n (%)                | 49 (10.5)        | 43 (9.6)           | 92 (10.1)        | 0                     | 0.67  |
| Witnessed by EMS, n (%)                        | 43 (9.2)         | 46 (10.3)          | 89 (9.8)         | 0                     | 0.57  |
| EMS defibrillation, n (%)                      | 129 (27.6)       | 121 (27.1)         | 250 (27.4)       | 0                     | 0.87  |
| EMS response time, minutes (sd)                | 7.4 (5.9)        | 7.3 (4.8)          | 7.4 (5.4)        | 28 (3.1)              |       |

\*Location was classified as either private or public

Baseline characteristics of patients with out-of-hospital cardiac arrest included in the study (with statistical comparison)

CPR: cardio-pulmonary-resuscitation, EMS: emergency medical services, sd: standard deviation.

### Significance level with adjustments

| Analysis                                    | Semi adjusted* | Fully adjusted †   | Unadjusted ‡ |
|---------------------------------------------|----------------|--------------------|--------------|
| <i>Variable</i>                             |                | <i>Probability</i> |              |
| CCD (cm), median (IQR)                      | 0.88           | 0.76               | = 0.85       |
| CCDiT (%), median (IQR)                     | < 0.001        | < 0.001            | < 0.001      |
| CCR (compressions per minute), median (IQR) | < 0.001        | < 0.001            | < 0.001      |
| CCRiT (%), median (IQR)                     | < 0.001        | < 0.001            | < 0.001      |
| CCF (%), median (IQR)                       | < 0.001        | < 0.001            | < 0.001      |
| CCiT (%), median (IQR)                      | < 0.001        | < 0.001            | < 0.001      |

\* adjusted for bystander CPR, † adjusted for (all variables), ‡ no adjustment from manus table 2

Outcome descriptives significance with adjustments

*CCD: chest compression depth, CCDiT: chest compression depth in target, CCF: chest compression fraction, CCiT: compressions in target, cm: centimetre, CCR: chest compression rate, CCRiT: chest compression rate in target, IQR: interquartile range.*

Figure S1. Feedback dashboard.

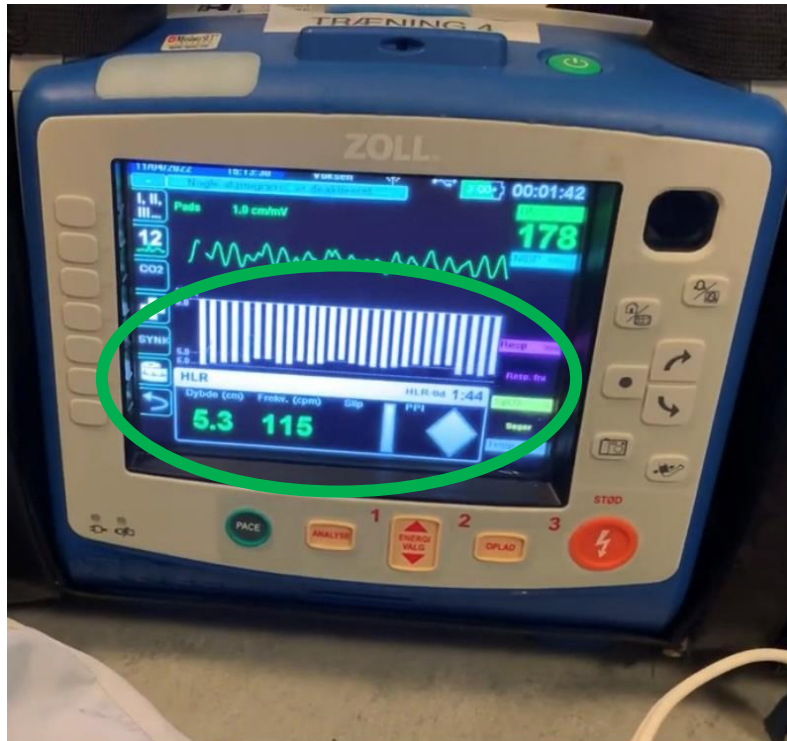

Chest compression feedback dashboard (in green circle) by Zoll® X-series® defibrillator

Figure S2. Reviewing procedure and editing of data.

## Algorithm for review of CPR quality data

| Step | Action                                          | Visual presentation                                                                 | Definition                                                                         | Tag                    | Validation                                    |
|------|-------------------------------------------------|-------------------------------------------------------------------------------------|------------------------------------------------------------------------------------|------------------------|-----------------------------------------------|
| 1    | Check for LUCAS pattern                         |   | Continuous compressions at rate 101 or 103/min                                     | LUCAS                  | Crosschecked by PPJ registrations             |
| 2    | Check for false CPR start                       |   | Start of CPR by less than 20 sec / 30 compressions followed by a pause of > 90 sec | False CPR start        | No objective validation possible              |
| 3    | Check for compressions during registered pauses |   | Irregular compression pattern seen during a registered CPR pause period            | Pause with compression | If possible crosschecked by PPJ registrations |
| 4    | Check for other irregular patterns              |  | Any pattern deviations from 30:2 or 10:1 not explained by step 1-3                 | Abnormal case          | No objective validation possible              |
| 5    | End review of case                              |                                                                                     | Option 1: no need for edit<br>Option 2: Need for edit                              | 1: OK<br>2: Data error | No applicable                                 |



## Algorithm for editing of CPR quality data

| Step | Action                                                    | Definition                                                                         | Tag                            | Validation                                    |
|------|-----------------------------------------------------------|------------------------------------------------------------------------------------|--------------------------------|-----------------------------------------------|
| 1    | Edit LUCAS pattern                                        | Continuous compressions at rate 101 or 103/min                                     | LUCAS removed                  | Crosschecked by PPJ registrations             |
| 2    | Edit false CPR start                                      | Start of CPR by less than 20 sec / 30 compressions followed by a pause of > 90 sec | False CPR start removed        | No objective validation possible              |
| 3    | Remove periods with compressions during registered pauses | Irregular compression pattern seen during a registered CPR pause period            | Pause with compression removed | If possible crosschecked by PPJ registrations |
| 4    | Investigate and edit other irregular patterns registered  | Any pattern deviations from 30:2 or 10:1 not explained by step 1-3                 | Tags 1-3                       | No objective validation possible              |
| 5    | Check for length of CPR after edit                        | If no compressions or less than 20 sec / 30 compressions                           | No CPR                         | No applicable                                 |
| 6    | End review of case                                        | Remove "data error" tag<br>Add: "Data error corrected" + "OK"                      | "Data error corrected"<br>"OK" | No applicable                                 |

CPR: cardio-pulmonary-resuscitation, LUCAS: Lund University Cardiopulmonary Assist System, PPJ: Prehospital Patient Journal (report form)
